# Supplementary material
Source: Springer Nature journal article supplement (https://www.springermedizin.de/resource/supplementary/12935_2011_301_MOESM8_ESM.pdf/9540264)

**A**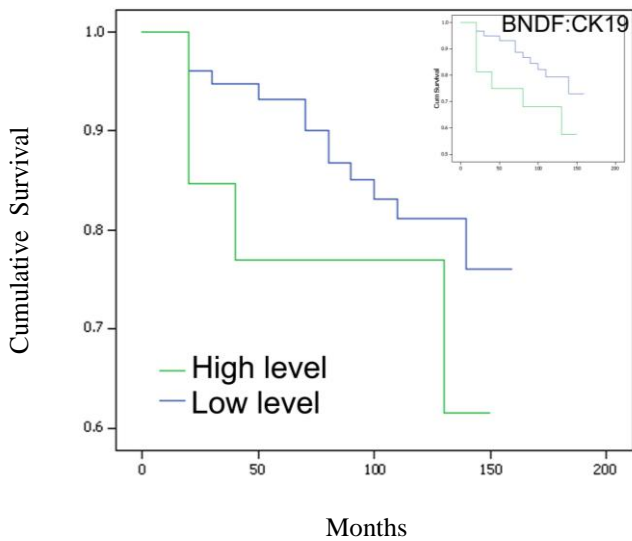**B**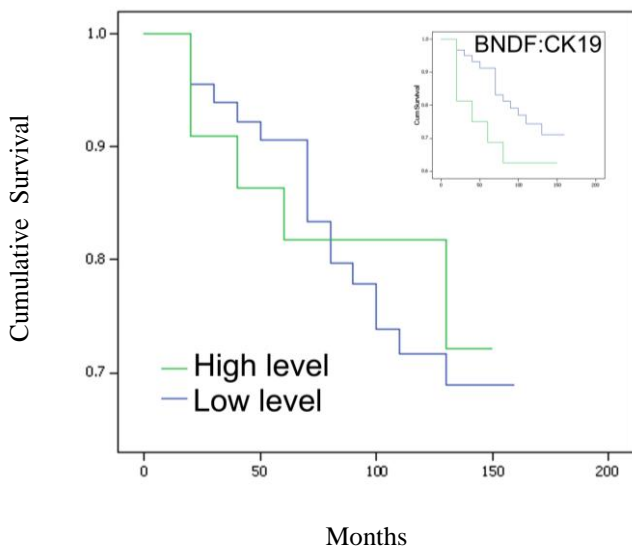

Supplement: MOESM8 [file 9540264]
